# Supplementary material for: Design of highly porous Fe3O4@reduced graphene oxide via a facile PMAA-induced assembly
Source: Royal Society of Chemistry journal article supplement (doi:10.1039/c9ra04980k), 2019-01-01
Supplement: c9ra04980k1.pdf [file c9ra04980k1.pdf]

## Supporting Information

### Design of highly porous Fe<sub>3</sub>O<sub>4</sub>@reduced graphene oxide via a facile PMAA-induced assembly

Huan Wang,<sup>†</sup> Madumali Kalubowilage,<sup>‡</sup> Stefan H. Bossmann,<sup>‡</sup> and Placidus B. Amama<sup>\*†</sup>

<sup>†</sup>*Tim Taylor Department of Chemical Engineering, Kansas State University, Manhattan, KS 66506, USA*

<sup>‡</sup>*Department of Chemistry, Kansas State University, Manhattan, KS 66506, USA*

**Table S1.** Comparison of surface area of Fe<sub>3</sub>O<sub>4</sub>@RGO composites.

| Ratio of Fe <sub>3</sub> O <sub>4</sub> (wt %) | Surface Area (m <sup>2</sup> /g) | Ref.      |
|------------------------------------------------|----------------------------------|-----------|
| 84                                             | 114.5                            | 12        |
| 70                                             | 221                              | 28        |
| 75                                             | 262                              | 37        |
| 60                                             | 52.84                            | 38        |
| 46                                             | 110                              | 39        |
| 60                                             | 338.8                            | This work |

## Supporting Information

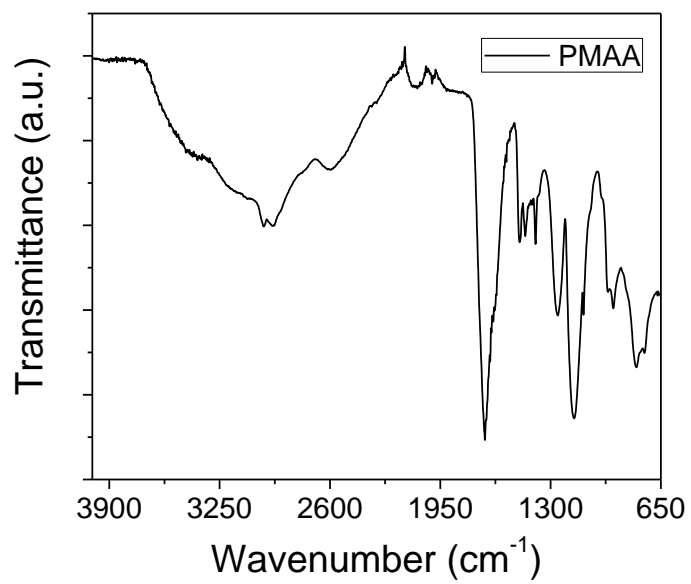

Fig. S1 FTIR spectrum of as-synthesized PMAA.

## Supporting Information

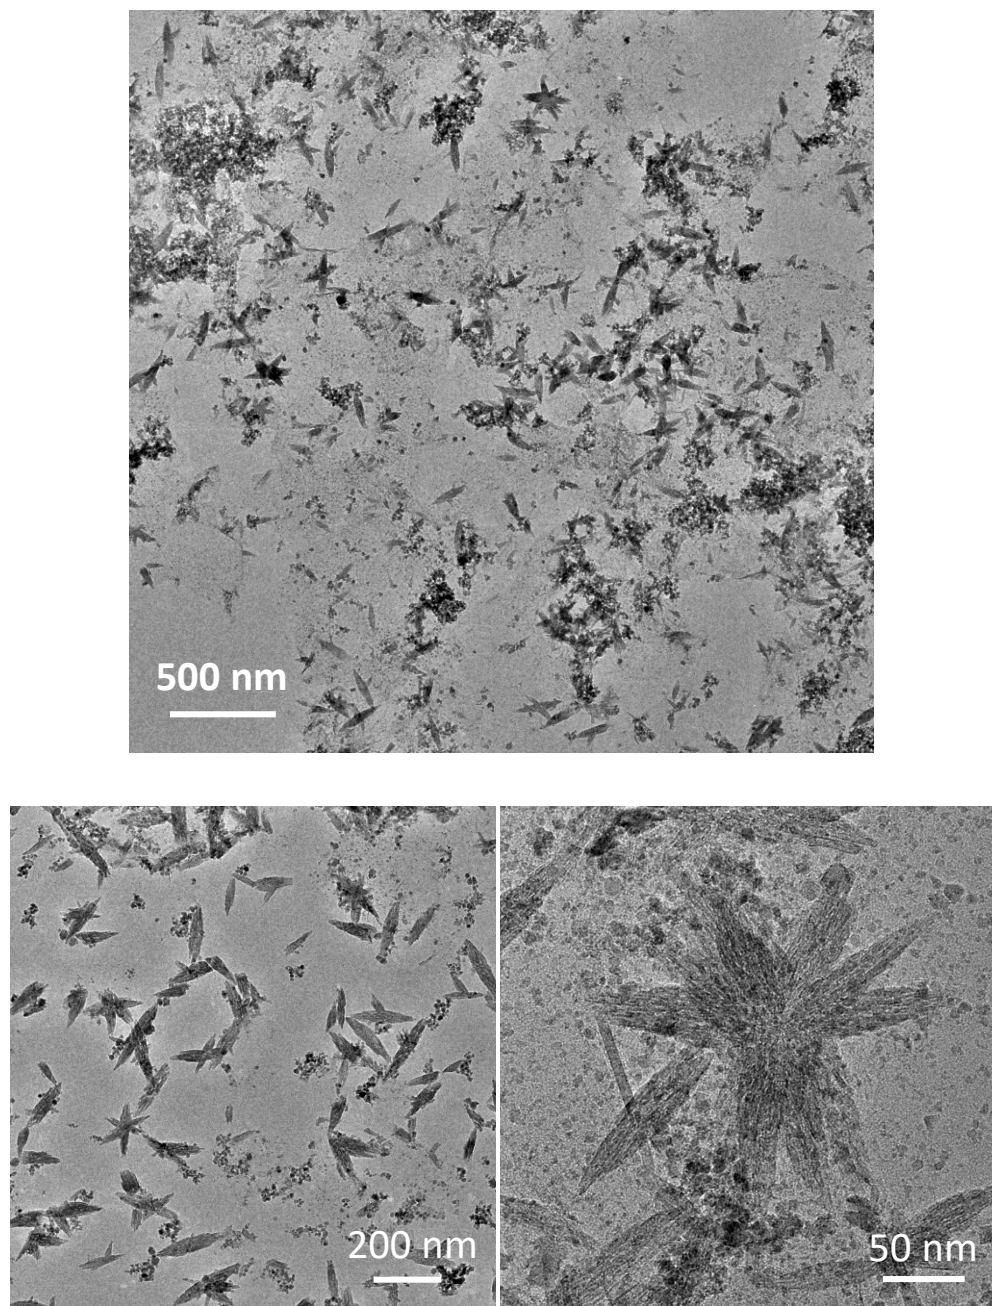

Fig. S2 TEM images of  $\text{Fe}_3\text{O}_4@\text{RGO}$  sheets dispersed at pH 9 with 4.8 mg/ml PMAA in water.

## Supporting Information

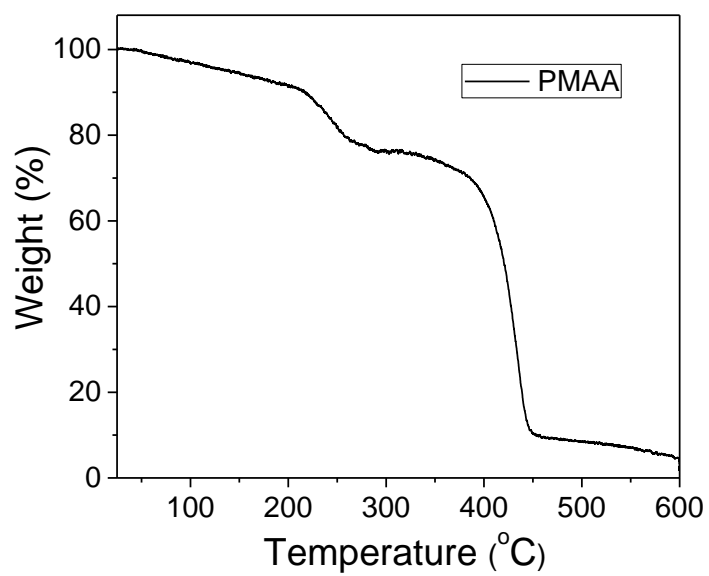

Fig. S3 TGA curve of PMAA under N<sub>2</sub> flow at a temperature ramp of 5 °C min<sup>-1</sup> in air.

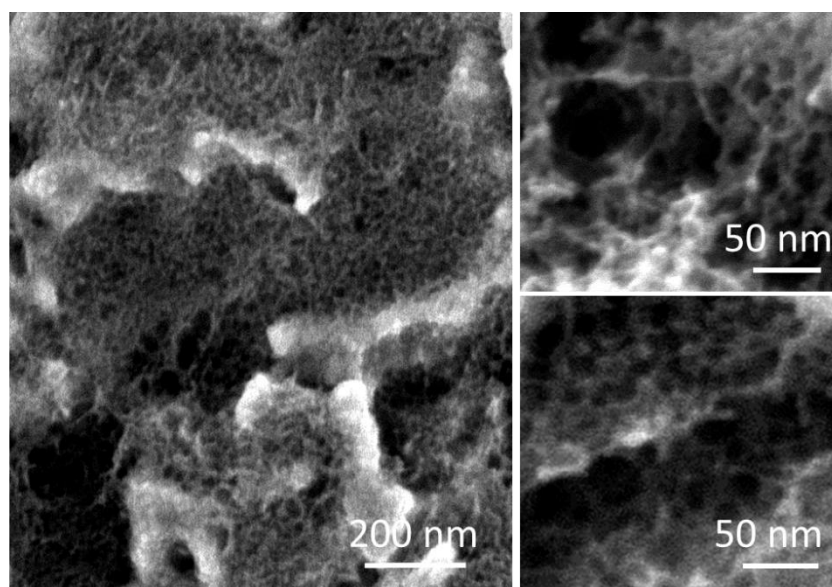

Fig. S4 SEM images of porous Fe<sub>3</sub>O<sub>4</sub>@RGO anodes.

## Supporting Information

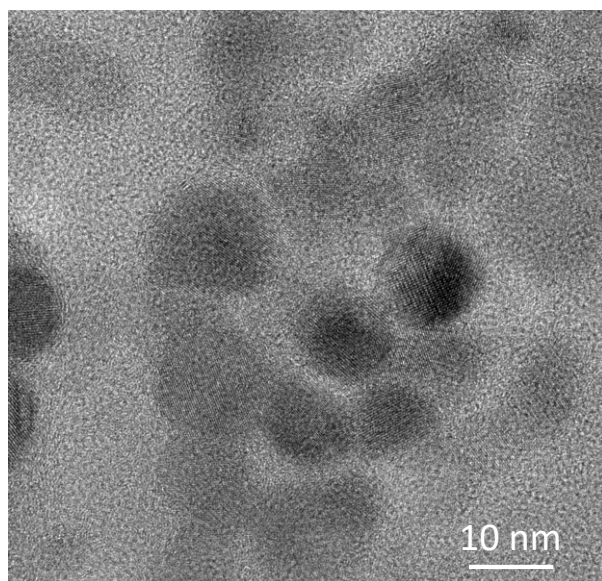

Fig. S5 TEM image of Fe<sub>3</sub>O<sub>4</sub>@RGO nanosheets

## Supporting Information

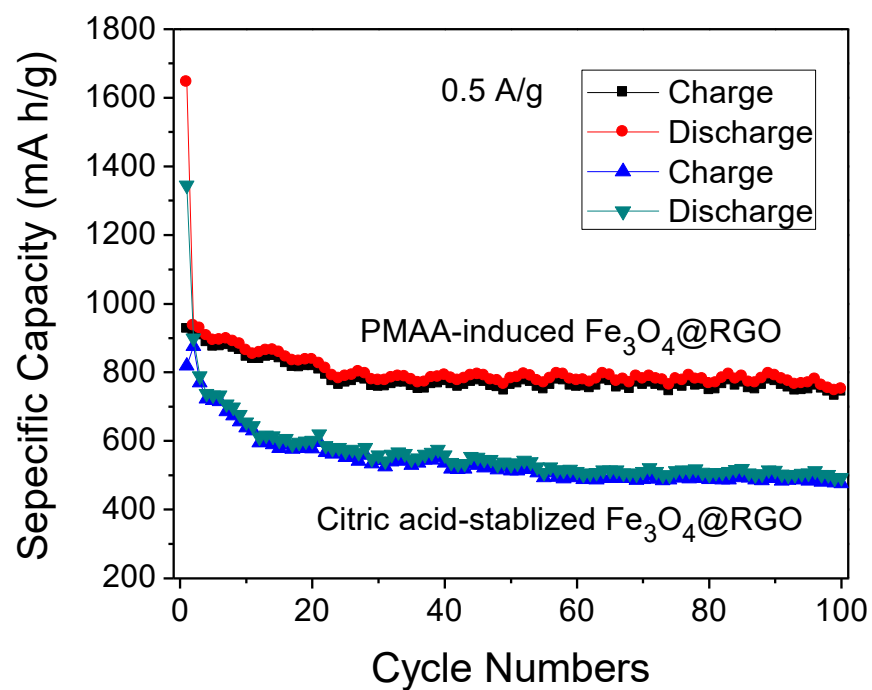

Fig. S6 Cycling performance of a PMAA-induced  $\text{Fe}_3\text{O}_4/\text{RGO}$  anode and a citric acid-stabilized  $\text{Fe}_3\text{O}_4@\text{RGO}$  anode at a current density of  $0.5 \text{ A/g}$  in the potential window of  $3.0\text{--}0.002 \text{ V}$  (vs.  $\text{Li/Li}^+$ ).
